# Supplementary material for: Recent Advances in Arsenic Research: Significance of Differential Susceptibility and Sustainable Strategies for Mitigation
Source: PubMed Central journal article supplement (PMC7578365; doi:10.3389/fpubh.2020.00464), 2020-10-08
Supplement: Table_1.pdf [file Table_1.pdf]

**Supplementary Table 1. Dietary sources responsible for chronic arsenic toxicity.**

|   | Source                                                                                              | Concentration                                                                                                   | country                                                                                                   | References                                                                                                                                                                                                                                                    |
|---|-----------------------------------------------------------------------------------------------------|-----------------------------------------------------------------------------------------------------------------|-----------------------------------------------------------------------------------------------------------|---------------------------------------------------------------------------------------------------------------------------------------------------------------------------------------------------------------------------------------------------------------|
| 1 | <b>Drinking water</b><br>(tube well, well water, ground water, aquifers)<br>( $\mu\text{gL}^{-1}$ ) | 4 to 5300<br>16.0-73<br>1 to 3644<br>10- 350<br>90-860<br>10- 1081.25<br>1-4200<br>1-45.9<br>10-2580<br>1 - 632 | Argentina<br>Australia<br>Bangladesh<br>Brazil<br>Chile<br>China<br>India<br>Italy<br>Pakistan<br>Vietnam | McClintock et al., 2012<br>Hinwood et al., 2003<br>Rahman et al., 2006<br>McClintock et al., 2012<br>Tapia et al., 2018<br>Rodríguez-Lado, 2013<br>Bhattacharya et al., 2011, 2013<br>Achene et al., 2010<br>shahid et al., 2018<br><u>Agusa</u> et al., 2014 |
| 2 | <b>Cereals and pulses</b><br>( $\text{mg Kg}^{-1}$ )                                                |                                                                                                                 |                                                                                                           |                                                                                                                                                                                                                                                               |
|   | • Rice                                                                                              | 0.05-0.42<br>0.021–0.66<br>0.2-1.17<br>0.291–1.411                                                              | Australia<br>Bangladesh<br>China<br>India                                                                 | Tinggi et al., 2014<br>Islam et al., 2014<br>Wu et al., 2011<br>Rahaman et al., 2013                                                                                                                                                                          |
|   | • Maize                                                                                             | 0.20–0.55<br>0.123–0.342                                                                                        | Bangladesh<br>India                                                                                       | Islam et al., 2014<br>Rahaman et al., 2013                                                                                                                                                                                                                    |
|   | • Wheat                                                                                             | 0.027–0.50<br>0.097–0.211                                                                                       | Bangladesh<br>India                                                                                       | Islam et al., 2014<br>Rahaman et al., 2013                                                                                                                                                                                                                    |
|   | • Lentil                                                                                            | 0.029–0.121                                                                                                     | India                                                                                                     | Rahaman et al., 2013                                                                                                                                                                                                                                          |
|   | • Gram                                                                                              | 0.098–0.213                                                                                                     | India                                                                                                     | Rahaman et al., 2013                                                                                                                                                                                                                                          |
| 3 | <b>Vegetables, Fruits</b><br>( $\text{mg Kg}^{-1}$ )                                                |                                                                                                                 |                                                                                                           |                                                                                                                                                                                                                                                               |
|   | • Potato                                                                                            | 0.25-0.34<br>0.312–1.464<br>0.003–0.015                                                                         | Bangladesh<br>India<br>China                                                                              | Islam et al., 2014<br>Rahaman et al., 2013<br>Jiang et al., 2016                                                                                                                                                                                              |
|   | • Carrot                                                                                            | 0.25-0.34<br>0.50-0.56                                                                                          | Bangladesh<br>Chile                                                                                       | Islam et al., 2014<br>Pizarro et al., 2016                                                                                                                                                                                                                    |
|   | • Banana                                                                                            | 0.086–0.57<br>0.10–0.25                                                                                         | Bangladesh<br>Bangladesh                                                                                  | Islam et al., 2014<br>Islam et al., 2014                                                                                                                                                                                                                      |
|   | • Mango                                                                                             | BDL-0.194                                                                                                       | India                                                                                                     | Rahaman et al., 2013                                                                                                                                                                                                                                          |

|   |                                                       |                                         |                              |                                                               |
|---|-------------------------------------------------------|-----------------------------------------|------------------------------|---------------------------------------------------------------|
| 4 | <b>Mushroom (mg Kg<sup>-1</sup>)</b>                  | ≥ 0.4<br>0.27                           | USA<br>Spain                 | Seyfferth et al., 2016<br><u>Melgar</u> et al., 2014          |
| 5 | <b>Egg (mg Kg<sup>-1</sup>)</b>                       | 0.05–0.28<br>0.001–0.020<br>0.155-0.222 | Bangladesh<br>China<br>India | Islam et al., 2014<br>Jiang et al., 2016<br>Rana et al., 2012 |
| 6 | <b>Meat (mg Kg<sup>-1</sup>)</b>                      |                                         |                              |                                                               |
|   | • Beef                                                | 0.008–0.066                             | Bangladesh                   | Islam et al., 2014                                            |
|   | • Chicken                                             | 0.012–0.074                             | Bangladesh                   | Islam et al., 2014                                            |
|   | • Duck                                                | 0.015–0.070                             | Bangladesh                   | Islam et al., 2014                                            |
|   | • Pork                                                | 0.002–0.035                             | China                        | Jiang et al., 2016                                            |
| 7 | <b>Fish, shellfish, sea-food (mg Kg<sup>-1</sup>)</b> |                                         |                              |                                                               |
|   | • Fish                                                | 0.04-0.94<br>0.025–0.074                | Bangladesh<br>China          | Islam et al., 2014<br>Jiang et al., 2016                      |
|   | • Marine fish                                         | 0.01–0.63                               | India                        | Deshpande et al., 2009                                        |
|   | • Shrimp                                              | 0.194–0.482                             | China                        | Jiang et al., 2016                                            |
|   | • Crab                                                | 0.393–0.657                             | China                        | Jiang et al., 2016                                            |
| 8 | <b>Cow milk (mg Kg<sup>-1</sup>)</b>                  | 0.004–0.16                              | Bangladesh                   | Islam et al., 2014                                            |

## References

Achene, L., Ferretti, E., Lucentini, L., Pettine, P., Veschetti, E., Ottaviani, M., 2010. Arsenic content in drinking-water supplies of an important volcanic aquifer in central Italy. *Toxicological & Environmental Chemistry*. 92, 509-520.

Agusa, T., Trang, P., T., Lan, V., M., Anh, D., H., Tanabe, S., Viet, P., H., Berg, M., 2014. Human exposure to arsenic from drinking water in Vietnam. *Sci Total Environ*. 488-489, 562-9. doi: 10.1016/j.scitotenv.2013.10.039.

Bhattacharya, P., Mukherjee, A., Mukherjee, A., B., 2011. Arsenic in Groundwater of India. *Encyclopedia of Environmental Health*. DOI: 10.1016/B978-0-444-52272-6.00345-7

Bhattacharya, P., Mukherjee, A., Mukherjee, A., B., 2013. Groundwater Arsenic in India: Source, Distribution, Effects and Alternate Safe Drinking Water Sources. Reference Module in Earth Systems and Environmental Sciences, Elsevier.

Deshpande, A., Bhendigeri, S., Shirsekar, T., Dhaware, D., Khandekar, R., N., 2009. Analysis of heavy metals in marine fish from Mumbai Docks. *Environ Monit Assess*. 159, 493–500.

- Hinwood, A., L., Sim, M., R., Jolley, D., de Klerk, N., Bastone, E., B., Gerostamoulos, J., Drummer, O., H., 2003. Hair and toenail arsenic concentrations of residents living in areas with high environmental arsenic concentrations. *Environ Health Perspect.* 111, 187-193.
- Huang, C. Y., Lin, Y. C., Shiue, H. S., Chen, W. J., Su, C. T., Pu, Y. S., Hsueh, Y. M., et al., 2018. Comparison of arsenic methylation capacity and polymorphisms of arsenic methylation genes between bladder cancer and upper tract urothelial carcinoma. *Toxicology Letters*, 295, 64–73.
- Huang, C. Y., Su, C. T., Chu, J. S., Huang, S. P., Pu, Y. S., Yang, H. Y., Hsueh, Y. M., 2011. The polymorphisms of P53 codon 72 and MDM2 SNP309 and renal cell carcinoma risk in a low arsenic exposure area. *Toxicology and Applied Pharmacology*, 257(3), 349–355.
- Huang, C.Y., Chung, C.J., Pu, Y., S., Lin, Y., C., Wu, C., C., Shiue, H., S., Huang, Y., K., 2013. Polymorphism of inflammatory genes and arsenic methylation capacity are associated with urothelial carcinoma. *Toxicology and Applied Pharmacology*, 272(1), 30–36.
- Huang, C.Y., Huang, Y.L., Hsueh, Y.M., Lin, Y.C., Chiang, C.I., Chen, W.J., ... Shiue, H.S., 2014. XRCC1 Arg194Trp and Arg399Gln polymorphisms and arsenic methylation capacity are associated with urothelial carcinoma. *Toxicology and Applied Pharmacology*, 279(3), 373–379.
- Islam, M., S., Ahmed, M., K., Habibullah-Al-Mamun, M., Islam, K., N., Ibrahim, M., Masunaga, S., 2014. Arsenic and lead in foods: a potential threat to human health in Bangladesh. *Food Addit Contam Part A Chem Anal Control Expo Risk Assess.* 31,1982-92.
- Jiang, Y., Chao, S., Liu, J., Yang, Y., Chen, Y., Zhang, A., Cao, H., 2016. Source apportionment and health risk assessment of heavy metals in soil for a township in Jiangsu Province, China. *Chemosphere.* 168, 1658-1668.
- McClintock, T., R., Chen, Y., Bundschuh, J., Oliver, J., T., Navoni, J., Olmos, V., Lepori, E., V., Ahsan, H., Parvez, F., 2012. Arsenic exposure in Latin America: biomarkers, risk assessments and related health effects. *Sci Total Environ.* 429, 76-91.
- Melgar, M., J., Alonso, J., García, M., A., 2014. Total contents of arsenic and associated health risks in edible mushrooms, mushroom supplements and growth substrates from Galicia (NW Spain). *Food and Chemical Toxicology* 73, 44–50.
- Pizarro, I., Gómez-Gómez, M., León J., Román D., Antonia Palacios, M., 2016. Bioaccessibility and arsenic speciation in carrots, beets and quinoa from contaminated area of Chile. *Science of the Total Environment* 565, 557–563.
- Rahaman, S., Sinha, A., C., Pati, R., Mukhopadhyay, D., 2013. Arsenic contamination: a potential hazard to the affected areas of West Bengal, India. *Environ Geochem Health.* 35,119–132.

Rana, T., Bera, A., K., Mondal, D., K., Das, S., Bhattacharya, D., Samanta, S., Pan, D., Das, S., K., 2014. Arsenic residue in the products and by-products of chicken and ducks: a possible concern of avian health and environmental hazard to the population in West Bengal, India. *Toxicol Ind Health*. 30(6), 576-80. doi: 10.1177/0748233712462467.

Seyfferth, A., L., McClatchy, C., Paukett, M., 2016. Arsenic, Lead, and Cadmium in U.S. Mushrooms and Substrate in Relation to Dietary Exposure. *Environ Sci Technol*. 50, 9661-70.

Shahid, M., Niazi, N., K., Dumat, C., Khalid S., Bibi, I., 2018. A meta-analysis of the distribution, sources and health risks of arsenic-contaminated groundwater in Pakistan. *Environmental Pollution* 242, 307-319.

Tapia, J., S., Valdés, J., Orrego, R., Tchernitchin, A., Dorador, C., Bolados, A., Harrod, C., 2018. Geologic and anthropogenic sources of contamination in settled dust of a historic mining port city in northern Chile: health risk implications. *PeerJ*. 6, e4699.

Tinggi, U., Schoendorfer, N., Scheelings, P., Yang, X., Jurd, S., Robinson, A., Smith, K., & Piispanen, J., 2014. Arsenic in rice and diets of children. *Toxicology and Industrial Health* 30, 576–580.

Wu, C., Ye, Z., Shu, W., Zhu, Y., Wong, M., 2011. Arsenic accumulation and speciation in rice are affected by root aeration and variation of genotypes. *Journal of Experimental Botany*, 62, 2889–2898.
