# Supplementary material for: Recent Advances in Arsenic Research: Significance of Differential Susceptibility and Sustainable Strategies for Mitigation
Source: PubMed Central journal article supplement (PMC7578365; doi:10.3389/fpubh.2020.00464), 2020-10-08
Supplement: Table_2.pdf [file Table_2.pdf]

**Supplementary table 2. Genetic polymorphisms involved in arsenic induced differential susceptibility and risk of disease manifestation (Reports from last 10 years)**

**Genes involved in arsenic metabolism pathway**

*AS3MT (Arsenite Methyltransferase)*

|    | <b>Region and sample size</b> | <b>Source of arsenic (samples used for estimation)</b> | <b>Polymorphism</b>                                                                       | <b>Association</b>                                                                                               | <b>References</b>        |
|----|-------------------------------|--------------------------------------------------------|-------------------------------------------------------------------------------------------|------------------------------------------------------------------------------------------------------------------|--------------------------|
| 1. | Taiwan; 863                   | Drinking water (water)                                 | Met (287) Thr                                                                             | For high exposure level (>50 µg/L), the T-C haplotype is associated with a high risk of carotid atherosclerosis. | Hsieh et al., 2011       |
| 2. | USA ,492                      | Drinking water (urine)                                 | Met (287) Thr<br>T>C                                                                      | One or more copies of the C allele had an elevated risk of bladder cancer.                                       | Beebe-Dimmer et al.,2012 |
| 3. | Texas,499                     | Drinking water (water)                                 | A35991G (rs10748835)                                                                      | Associated with hyperlipidemia and hypertension                                                                  | Gong et al.,2012         |
| 4. | USA, 2023                     | Drinking water (water)                                 | rs1046778, rs3740391, rs3740392, rs3740393, rs11191439, rs7085854, rs10748835, rs11191454 | No association was found with bladder cancer.                                                                    | Lesueur et al., 2012     |
| 5. | Bangladesh, 2879              | Drinking water (urine)                                 | G>A<br>(rs 9527)                                                                          | A allele was associated with decreased DMA% and increased skin lesion risk                                       | Pierce et al., 2012      |
| 6. | Bangladesh, 1742              | Drinking water (water, urine)                          | rs11191439                                                                                | wild type rs11191439 was significantly associated with lower levels of urinary MMA%.                             | Rodrigues et al., 2012   |
| 7. | Mexico,255                    | Drinking water (urine)                                 | M287T,<br>G4965C                                                                          | Associated with higher levels of urinary DMA%, arsenic metabolism and diabetes.                                  | Drobna et al.,2013       |
| 8. | Bangladesh,2060               | Drinking water (urine)                                 | 2 SNPs in the 10q24.32 region                                                             | Independent associations with metabolism efficiency skin lesion risk.                                            | Pierce et al.,2013       |

|     |                             |                               |                                                                                                                                                      |                                                                                                                                                                                                      |                          |
|-----|-----------------------------|-------------------------------|------------------------------------------------------------------------------------------------------------------------------------------------------|------------------------------------------------------------------------------------------------------------------------------------------------------------------------------------------------------|--------------------------|
| 9.  | Texas,526                   | Drinking water (urine)        | A35991G, (rs10748835)                                                                                                                                | Associated with cognitive functioning.                                                                                                                                                               | Edwards et al.,2014      |
| 10. | China, 242                  | Drinking water (urine)        | Met (287) Thr                                                                                                                                        | No association was found.                                                                                                                                                                            | Fu et al., 2014          |
| 11. | Chile, 207                  | Copper mine industry (urine)  | Met (287) Thr                                                                                                                                        | Associated with arsenic-induced cytogenetic damage.                                                                                                                                                  | Hernandez et al.,2014    |
| 12. | Bangladesh, 1078            | Drinking water (urine)        | rs10883790, rs11191442, rs3740392                                                                                                                    | Associated with urinary As and carotid intima-media thickness (cIMT).                                                                                                                                | Wu et al., 2014          |
| 13. | Eastern Europe,1062         | Drinking water (urine)        | rs3740400 A/C, rs3740393 G/C, rs11191439 T/C, rs1046778 T/C                                                                                          | Associated with methylation efficiency and risk of basal cell carcinoma.                                                                                                                             | Engstrom et al.,2015     |
| 14. | India, 315                  | Drinking water (water, urine) | C10 or f32 region (rs 9527; G>A)                                                                                                                     | G>A change in the C10orf32 region was associated with increased skin lesion risk.                                                                                                                    | Das et al., 2016         |
| 15. | Bangladesh, 4794            | Drinking water (water, urine) | 10q24.32/AS3MT region. rs9527, rs11191527                                                                                                            | rs9527 and rs11191527 were strongly associated with DMA%, but not with PMI.                                                                                                                          | Jansen et al.,2015       |
| 16. | American Indian tribes, USA | Drinking water (urine)        | rs12768205, rs3740394, rs3740393                                                                                                                     | Genetic variants were associated with As metabolism, MMA and DMA.                                                                                                                                    | Balakrishnan et al.,2017 |
| 17. | Taiwan, 1241                | Drinking water (urine)        | rs3740393, rs3740392, rs11191438, rs3740391, rs11191439, rs11191453, rs11191454, rs10748835, rs1046778                                               | rs11191438, rs10748835, and rs1046778 were related to the risk of bladder cancer and urothelial carcinoma, while rs3740393, rs11191453, and rs11191454 were associated with As methylation capacity. | Huang et al., 2018       |
| 18. | China, 850                  | Drinking water (urine)        | (rs1046778, rs10748835, rs10883790, rs11191438, rs11191442, rs11191454, rs12416687, rs3740390, rs3740392, rs3740393, rs7085104, rs7085854, rs7098825 | Not associated with skin lesion.                                                                                                                                                                     | Luo et al., 2018         |

|     |                  |                              |                                                                               |                                                                                                                                                                                                                           |                       |
|-----|------------------|------------------------------|-------------------------------------------------------------------------------|---------------------------------------------------------------------------------------------------------------------------------------------------------------------------------------------------------------------------|-----------------------|
| 26. | Bangladesh, 1613 | Drinking water (urine)       | rs9527, rs1046778, rs1046778                                                  | Associated with urinary %DMA in pregnant woman.                                                                                                                                                                           | Gao et al., 2019      |
| 27. | Croatia, 312     | Sea food consumption (urine) | rs7085104, rs3740400, rs3740393, rs3740390, rs11191439, rs10748835, rs1046778 | Study showed 'protective' effect of six individual SNPs (rs7085104, rs3740400, rs3740393, rs3740390, rs10748835 and rs1046778, minor alleles) and their haplotype in non-pregnant women only (lower MMA% and higher SMI). | Stajanko et al., 2019 |

***MTHFR (Methylenetetrahydrofolate reductase)***

|    |                            |                               |                      |                                                                                                                                          |                           |
|----|----------------------------|-------------------------------|----------------------|------------------------------------------------------------------------------------------------------------------------------------------|---------------------------|
| 1. | Taiwan, 450                | Drinking water (water, urine) | C677T                | The CT or TT genotype was associated with decreased urinary DMA% and decreased folate levels and increased risk of urothelial carcinoma. | Chung et al., 2010        |
| 2. | Southeastern Michigan ,492 | Drinking water (urine)        | rs1476413            | Lower risk of bladder cancer was observed among homozygotes for the A allele in exposed population.                                      | Beebe-Dimmer et al., 2012 |
| 3. | Bangladesh, 1464           | Drinking water (urine)        | C677T (rs1801133)    | The T allele of 677 C> T was associated with higher %MMA, and lower %DMA, but not with skin lesions.                                     | Niedzwiecki et al., 2018  |
| 4. | Croatia, 312               | Sea food consumption (urine)  | rs1801131, rs1801133 | No association observed.                                                                                                                 | Stajanko et al., 2019     |

***PNP (purine nucleoside phosphorylase)***

|    |                  |                        |                                                        |                                                                                                                 |                    |
|----|------------------|------------------------|--------------------------------------------------------|-----------------------------------------------------------------------------------------------------------------|--------------------|
| 1. | Taiwan; 50       | Sea food (urine)       | rs1760940, rs17884106, rs1049562, rs1049564, rs1130650 | Not associated with urinary arsenic                                                                             | Hwang et al., 2010 |
| 2. | Taiwan; 863      | Drinking water (water) | Gly51Ser, Pro57Pro                                     | For high exposure level (>50 µg/L), the A-T haplotype was associated with high risk of carotid atherosclerosis. | Hsieh et al., 2011 |
| 3. | Bangladesh, 1078 | Drinking water (urine) | rs17886095, rs17882804, rs3790064                      | Associated with urinary As and cIMT                                                                             | Wu et al., 2014    |
| 4. | China, 850       | Drinking water (urine) | rs1713420,rs1760940,rs3790064,                         | rs3790064 was associated with arsenic-induced skin lesions.                                                     | Luo et al., 2018   |

|                                                                             |                    |                                  |                                  |                                                                                                                                                                                               |                           |
|-----------------------------------------------------------------------------|--------------------|----------------------------------|----------------------------------|-----------------------------------------------------------------------------------------------------------------------------------------------------------------------------------------------|---------------------------|
| 5.                                                                          | Taiwan, 1241       | Drinking water<br>(urine)        | rs1049562, rs1049564, rs1130650; | No association was found.                                                                                                                                                                     | Huang et al., 2018        |
| <b><i>PEMT (Phosphatidylethanolamine N-methyltransferase)</i></b>           |                    |                                  |                                  |                                                                                                                                                                                               |                           |
| 1                                                                           | Bangladesh;<br>940 | Drinking water<br>(water)        | rs2278952                        | Polymorphism significantly modified arsenic induced skin lesion status.                                                                                                                       | Seow et al., 2015         |
| <b><i>DHFR (Dihydrofolate reductase)</i></b>                                |                    |                                  |                                  |                                                                                                                                                                                               |                           |
| 1                                                                           | Bangladesh;<br>940 | Drinking water<br>(water)        | rs1650697                        | Polymorphism significantly modified arsenic induced skin lesion status.                                                                                                                       | Seow et al., 2015         |
| <b><i>CBS (Cystathionine beta-synthase)</i></b>                             |                    |                                  |                                  |                                                                                                                                                                                               |                           |
| 1.                                                                          | Argentina;<br>142  | Drinking water<br>(water, urine) | C234709T, G4920037A              | Associated with urinary MMA%.                                                                                                                                                                 | Porter et al., 2010       |
| 2.                                                                          | Argentina;<br>120  | Drinking water<br>(water, urine) | C234709T, G4920037A              | Associated with urinary MMA% and lung cancer.                                                                                                                                                 | Steinmaus et al., 2010    |
| <b><i>MTR (5-Methyltetrahydrofolate-Homocysteine Methyltransferase)</i></b> |                    |                                  |                                  |                                                                                                                                                                                               |                           |
| 1.                                                                          | Argentina;<br>142  | Drinking water<br>(water, urine) | Asp919Gly (rs1805087)            | No association was found.                                                                                                                                                                     | Porter et al., 2010       |
| 2.                                                                          | Mexico,<br>2044    | Drinking water<br>(urine)        | 2756A > G (rs1805087)            | MTR 2756A>G polymorphism might confer protection for Breast Cancer associated with iAs exposure.                                                                                              | Gamboa-Loira et al., 2017 |
| <b><i>HO-1 (Heme oxygenase 1)</i></b>                                       |                    |                                  |                                  |                                                                                                                                                                                               |                           |
| 1.                                                                          | Taiwan;<br>787     | Drinking water<br>(water)        | Short GT-repeat HO-1             | Short GT-repeat HO-1 short allele was associated with a low risk of carotid atherosclerosis.                                                                                                  | Wu et al., 2010           |
| 2.                                                                          | Taiwan;<br>894     | Drinking water<br>(water)        | Short GT-repeat HO-1             | short allele was associated with a low risk of cardiovascular mortality in people with hypertension.                                                                                          | Wu et al., 2011b          |
| 3.                                                                          | Taiwan;<br>280     | Drinking water<br>(urine)        | Short GT-repeat HO-1             | No association with skin cancer.                                                                                                                                                              | Hsu et al., 2015          |
| 4.                                                                          | Taiwan;<br>1,013   | Drinking water<br>(water)        | Short GT-repeat HO-1             | participants with the Short/Short genotype had an increased risk of Bowen's disease invasive skin cancer and lung squamous cell carcinoma versus those with Long/Short or Long/Long genotype. | Wu et al., 2016           |

## Gene involved in arsenic transportation pathway

### *ABCC1/ MRPI(Multidrug resistance-associated protein 1)*

|    |            |                                 |        |                                                            |                   |
|----|------------|---------------------------------|--------|------------------------------------------------------------|-------------------|
| 1. | Turkey; 95 | Smelting work<br>(urine, blood) | G1666A | Polymorphism was associated with urinary As concentration. | Kaya et al., 2016 |
|----|------------|---------------------------------|--------|------------------------------------------------------------|-------------------|

## Genes involved in oxidative stress response pathway

### *GSTO1 (Glutathione S-transferase omega 1)*

|    |                                     |                                                 |                                                                      |                                                                                                                                                                                                                                  |                              |
|----|-------------------------------------|-------------------------------------------------|----------------------------------------------------------------------|----------------------------------------------------------------------------------------------------------------------------------------------------------------------------------------------------------------------------------|------------------------------|
| 1. | Taiwan; 400                         | Drinking water<br>(urine)                       | Ala140Asp, Glu208Lys                                                 | Wild-type Ala140Asp was associated with high urinary MMA%.                                                                                                                                                                       | Chung wt al., 2011           |
| 2. | Taiwan; 863                         | Drinking water<br>(water)                       | Ala140Asp,                                                           | For high exposure (>50 µg/L), haplotypes were associated with a high risk of carotid atherosclerosis.                                                                                                                            | Hsieh et al., 2011           |
| 3. | Taiwan; 764                         | Drinking water<br>(urine)                       | rs4925 (Ala140Asp),<br>rs11509438(Glu208Lys),<br>rs15032 (Thr217Asn) | Ala140Asp was associated with increased urothelial cancer risk.                                                                                                                                                                  | Hsu et al., 2011             |
| 4. | Michigan,<br>USA, 492               | Drinking water<br>(urine)                       | GSTO-1 (rs4925, rs2282326)                                           | No association was found.                                                                                                                                                                                                        | Beebe-Dimmer et al.,<br>2012 |
| 5. | Taiwan; 247                         | Drinking water<br>(urine)                       | Ala140Asp                                                            | Asp allele was associated with low urinary MMA% and a slightly high risk of metabolic syndrome                                                                                                                                   | Chen et al., 2012            |
| 6. | Bangladesh,<br>1742                 | Drinking water<br>(water, urine)                | Ala140Asp, rs4925                                                    | Homozygous wild type was significantly associated with higher MMA and DMA in urine.                                                                                                                                              | Rodrigues et al.,<br>2012    |
| 7. | China, 242                          | Drinking water<br>(urine)                       | Ala140Asp, Thr217Asn,<br>Ala236Val                                   | The %DMA of individuals with the Ala/Asp genotype was reduced significantly compared with the Ala/Ala genotype.                                                                                                                  | Fu et al., 2014              |
| 8. | Nadia, West<br>Bengal, India,<br>38 | Drinking water and food,<br>(urine, hair, nail) | Ala 140 Asp                                                          | Association of GSTO1 A140D polymorphism and global DNA methylation in the arsenic affected population                                                                                                                            | Majumdar et al.,<br>2017     |
| 9. | China, 850                          | Drinking water<br>(urine)                       | rs11191979, rs2164624,<br>rs2282326 and rs4925                       | Individuals carrying at least one C allele for the rs11191979 polymorphism, at least one A allele or the AA genotype for rs2164624 or at least one A allele for rs4925 showed a significant risk of arsenic-induced skin lesions | Luo et al., 2018             |

| <b><i>GSTO2 (Glutathione S-transferase omega 1)</i></b> |              |                                     |                                                 |                                                                                                                                                                     |                      |
|---------------------------------------------------------|--------------|-------------------------------------|-------------------------------------------------|---------------------------------------------------------------------------------------------------------------------------------------------------------------------|----------------------|
| 1.                                                      | Taiwan; 400  | Drinking water (urine)              | Asn142Asp                                       | Associated with urothelial carcinom risk.                                                                                                                           | Chung et al., 2011   |
| 2.                                                      | Taiwan; 863  | Drinking water (water)              | Asn142Asp, A183G                                | For high exposure (>50 µg/L), haplotypes were associated with a high risk of carotid atherosclerosis                                                                | Hsieh et al., 2011   |
| 3.                                                      | Taiwan; 764  | Drinking water (urine)              | rs2297235 Exon2 5'UTR (-183) rs156697 Asn142Asp | Associated with an increased urothelial cancer risk when compared to the all-wildtype reference, respectively.                                                      | Hsu et al., 2011     |
| 4.                                                      | USA, 2023    | Drinking water (water)              | Asn142Asp                                       | Polymorphism was associated with bladder cancer risk                                                                                                                | Lesueur et al., 2012 |
| 5.                                                      | China, 242   | Drinking water (urine)              | GSTO2 Asn142Asp                                 | No association was found.                                                                                                                                           | Fu et al., 2014      |
| 7.                                                      | China, 850   | Drinking water (urine)              | GSTO2 SNPs rs156697 and rs2297235               | Subjects who carried the AG genotype for rs156697 and the AG genotype or at least one G allele for rs2297235 had an increased risk of arsenic-induced skin lesions. | Luo et al., 2018     |
| <b><i>GSTP1 (Glutathione S-transferase Pi 1)</i></b>    |              |                                     |                                                 |                                                                                                                                                                     |                      |
| 1.                                                      | Vietnam; 100 | Drinking water (hair, water, urine) | Ile105Val                                       | polymorphisms were associated with the urinary As profile.                                                                                                          | Agusa et al., 2010   |
| 2.                                                      | Taiwan; 764  | Drinking water (urine)              | Ile105Val                                       | No association with urothelial carcinoma.                                                                                                                           | Hsu et al., 2011     |
| 3.                                                      | USA, 2023    | Drinking water (water)              | Ile105Val                                       | Polymorphism was associated with bladder cancer risk                                                                                                                | Lesueur et al., 2012 |
| 4.                                                      | Taiwan; 280  | Drinking water (urine)              | Ile105Val                                       | No association with skin cancer.                                                                                                                                    | Hsu et al., 2015     |
| 5.                                                      | Turkey, 95   | Smelting work (urine, blood)        | Ile105Val                                       | No association with the blood or urinary As levels.                                                                                                                 | Kaya et al., 2016    |
| 6.                                                      | China, 398   | Drinking water (hair)               | Ile105Val Rs 1695                               | No association was found with hypertension.                                                                                                                         | Yu et al., 2017      |

| <b><i>GSTT1 (Glutathione S-transferase theta 1)</i></b>        |              |                                        |                        |                                                                                                              |                       |
|----------------------------------------------------------------|--------------|----------------------------------------|------------------------|--------------------------------------------------------------------------------------------------------------|-----------------------|
| 1.                                                             | Vietnam; 100 | Drinking water<br>(hair, water, urine) | null genotype of GSTT1 | No association with the urinary As profile.                                                                  | Agusa et al., 2010    |
| 2.                                                             | USA, 2023    | Drinking water<br>(water)              | null genotype of GSTT1 | Greater risk of bladder cancer in the high arsenic exposure group associated with GSTT1 null.                | Lesueur et al., 2012  |
| 3.                                                             | Taiwan; 280  | Drinking water<br>(urine)              | null genotype of GSTT1 | Null genotype of GSTT1 is associated with skin cancer.                                                       | Hsu et al., 2015      |
| 4.                                                             | China, 230   | Drinking water<br>(urine)              | null genotype of GSTT1 | Associated with higher urinary secondary methylation index.                                                  | Yang et al., 2015     |
| 5.                                                             | Italy,241    | Drinking water<br>(urine)              | null genotype of GSTT1 | significant associations between GSTT1 and the As concentration and metabolite patterns in the urine.        | Borghini et al., 2016 |
| <b><i>GSTM1 (Glutathione S-transferase mu 1)</i></b>           |              |                                        |                        |                                                                                                              |                       |
| 1.                                                             | Vietnam; 100 | Drinking water<br>(hair, water, urine) | null genotype of GSTM1 | Null genotype of GSTM1 is associated with low DMA%.                                                          | Agusa et al., 2010    |
| 2.                                                             | USA, 2023    | Drinking water<br>(water)              | null genotype of GSTM1 | Greater risk of bladder cancer associated with null genotype                                                 | Lesueur et al., 2012  |
| 3.                                                             | Taiwan; 280  | Drinking water<br>(urine)              | null genotype of GSTM1 | No association with skin cancer.                                                                             | Hsu et al., 2015      |
| 4.                                                             | China, 230   | Drinking water<br>(urine)              | null genotype of GST1  | Associated with urinary As methylation.                                                                      | Yang et al., 2015     |
| 5.                                                             | Italy,241    | Drinking water<br>(urine)              | null genotype of GSTT1 | No association was found.                                                                                    | Borghini et al., 2016 |
| <b><i>GSTZ1 (Glutathione S-transferase zeta 1)</i></b>         |              |                                        |                        |                                                                                                              |                       |
| 1.                                                             | USA, 2023    | Drinking water<br>(water)              | Glu32Lys               | Polymorphism was associated with As induced bladder cancer risk.                                             | Lesueur et al., 2012  |
| <b><i>MnSOD (manganese-dependent superoxide dismutase)</i></b> |              |                                        |                        |                                                                                                              |                       |
| 1.                                                             | Taiwan; 240  | Drinking water<br>(urine)              | Ala9Val                | High urinary As level, 9Val/Ala and 9Ala/Ala polymorphisms were associated with a high risk of hypertension. | Chen et al., 2012     |

---

***EPHX1 (Epoxide hydrolase 1)***

|    |             |                        |                         |                                                              |                  |
|----|-------------|------------------------|-------------------------|--------------------------------------------------------------|------------------|
| 1. | Taiwan; 280 | Drinking water (urine) | Tyr113His, His139Arg    | Polymorphisms of Tyr113His were associated with skin cancer. | Hsu et al., 2015 |
| 2. | China, 398  | Drinking water (hair)  | rs1051740 and rs2234922 | No association was found with hypertension.                  | Yu et al., 2017  |

---

**Genes involved in DNA damage repair pathway and tumour suppressor genes*****ERCC2/ XPD (Excision Repair Cross-Complementing Rodent Repair Deficiency, Complementation Group 2/ Xeroderma Pigmentosum Group D)***

|    |             |                                      |                                   |                                                                         |                     |
|----|-------------|--------------------------------------|-----------------------------------|-------------------------------------------------------------------------|---------------------|
| 1. | USA, 891    | Drinking water (water, nail)         | A751C (rs171140) G312A(rs1799793) | G312A polymorphism was associated with bladder cancer risk              | Andrew et al., 2010 |
| 2. | China; 486  | Indoor coal combustion (hair, urine) | G23591A, A35931C                  | Polymorphisms of A35931C were potentially associated with skin lesions. | Lin et al., 2010    |
| 3. | Taiwan; 981 | Drinking water (urine)               | Lys751Gln                         | No association with urothelial carcinoma and urinary As profiles.       | Chiang et al. 2014  |
| 4. | Taiwan; 280 | Drinking water (urine)               | C156A, rs238406                   | Associated with arsenic induced skin lesion.                            | Hsu et al., 2015    |
| 5. | Taiwan; 540 | Drinking water (urine)               | Lys751Gln                         | No association with renal cell carcinoma                                | Hsueh et al, 2017   |

---

***XRCC1 (X-ray repair cross-complementing protein 1)***

|    |             |                        |                      |                                                                                                     |                       |
|----|-------------|------------------------|----------------------|-----------------------------------------------------------------------------------------------------|-----------------------|
| 1. | Taiwan; 981 | Drinking water (urine) | Arg194Trp, Arg399Gln | 399Gln/Gln and 194Arg/Trp and 194Trp/Trp were associated with urothelial carcinoma.                 | Chiang et al., 2014   |
| 2. | Taiwan; 280 | Drinking water (urine) | Arg280His, Arg399Gln | No association with skin cancer.                                                                    | Hsu et al., 2015      |
| 3. | Italy,241   | Drinking water (urine) | Arg399Gln            | Interaction between Arg399Gln and arsenic exposure was observed in connection with telomere length. | Borghini et al., 2016 |

---



|    |              |                        |                                                |                                                                                                                                      |                       |
|----|--------------|------------------------|------------------------------------------------|--------------------------------------------------------------------------------------------------------------------------------------|-----------------------|
| 4. | Vietnam, 100 | Drinking water (urine) | Arg194Trp, Arg280His, Pro206Pro, and Arg399Gln | Both Arg/Arg homozygous subjects and Arg/Gln heterozygous individuals showed a significantly higher urinary inorganic As percentage. | Fujihara et al., 2016 |
| 5. | Taiwan; 540  | Drinking water (urine) | Arg194Trp, Arg399Gln                           | 194Trp correlates with a decreased risk of RCC in a human population with low exposure to arsenic.                                   | Hsueh et al, 2017     |

***XRCC3 (X-ray repair cross-complementing protein 3)***

|    |                         |                               |           |                                                                                                               |                     |
|----|-------------------------|-------------------------------|-----------|---------------------------------------------------------------------------------------------------------------|---------------------|
| 1. | USA, 891                | Drinking water (water, nail)  | Thr241Met | Elevated bladder cancer risk was associated with toenail arsenic levels in heterozygotes compared to wildtype | Andrew et al., 2010 |
| 2. | West Bengal, India; 421 | Drinking water (water, urine) | Thr241Met | Met allele was associated with a low risk of skin lesions, peripheral neuropathy, and conjunctivitis.         | Kundu et al., 2011  |
| 3. | Taiwan; 981.            | Drinking water (urine)        | Thr241Met | No association with urothelial carcinoma.                                                                     | Chiang et al., 2014 |
| 4  | Taiwan; 540             | Drinking water (urine)        | Thr241Met | No association with renal cell carcinoma.                                                                     | Hsueh et al, 2017   |

***OGG1 (8-oxoguanine DNA glycosylase 1)***

|    |              |                        |           |                                                                                                                      |                       |
|----|--------------|------------------------|-----------|----------------------------------------------------------------------------------------------------------------------|-----------------------|
| 1. | Vietnam; 100 | Drinking water (urine) | Ser326Cys | Polymorphism was associated with a high urinary 8OHdG.                                                               | Fujihara et al., 2011 |
| 2. | Taiwan; 240  | Drinking water (urine) | Ser326Cys | For individuals with high urinary As level, 326Cys/Cys polymorphism was associated with a high risk of hypertension. | Chen et al., 2012     |
| 3. | Taiwan; 280  | Drinking water (urine) | Ser326Cys | No association with skin cancer.                                                                                     | Hsu et al., 2015      |

***APE1 (apurinic/aprimidinic endonuclease 1)***

|    |              |                        |           |                                                                 |                       |
|----|--------------|------------------------|-----------|-----------------------------------------------------------------|-----------------------|
| 1. | Vietnam; 100 | Drinking water (urine) | Asp148Glu | 148Asp/Glu polymorphism was associated with high urinary 8OHdG. | Fujihara et al., 2011 |
|----|--------------|------------------------|-----------|-----------------------------------------------------------------|-----------------------|

**XPC (*Xeroderma pigmentosum, complementation group C*)**

|    |                    |                           |           |                                                                         |                   |
|----|--------------------|---------------------------|-----------|-------------------------------------------------------------------------|-------------------|
| 1. | Bangladesh;<br>940 | Drinking water<br>(water) | rs2228000 | Polymorphism significantly modified arsenic induced skin lesion status. | Seow et al., 2015 |
|----|--------------------|---------------------------|-----------|-------------------------------------------------------------------------|-------------------|

**p53**

|    |                |                           |                       |                                                                                        |                    |
|----|----------------|---------------------------|-----------------------|----------------------------------------------------------------------------------------|--------------------|
| 1. | Taiwan;<br>381 | Drinking water<br>(urine) | Arg72Pro<br>rs1042522 | Arg/Pro + Pro/Pro polymorphism was associated with a high risk of renal cell carcinoma | Huang et al., 2011 |
|----|----------------|---------------------------|-----------------------|----------------------------------------------------------------------------------------|--------------------|

**p21 (also known as *cyclin-dependent kinase inhibitor 1*)**

|    |                |                           |                     |                                          |                    |
|----|----------------|---------------------------|---------------------|------------------------------------------|--------------------|
| 1. | Taiwan;<br>381 | Drinking water<br>(urine) | codon 31: rs1801270 | No association with renal cell carcinoma | Huang et al., 2011 |
|----|----------------|---------------------------|---------------------|------------------------------------------|--------------------|

**MDM2 (*Mouse double minute 2 homolog*)**

|    |                |                           |                    |                                                                         |                    |
|----|----------------|---------------------------|--------------------|-------------------------------------------------------------------------|--------------------|
| 1. | Taiwan;<br>381 | Drinking water<br>(urine) | T309G<br>rs2279744 | TG+GG genotype was associated with a high risk of renal cell carcinoma. | Huang et al., 2011 |
|----|----------------|---------------------------|--------------------|-------------------------------------------------------------------------|--------------------|

**Immune response related genes****IL10 (*Interleukin 10*)**

|    |                            |                                  |           |                                                                                                 |                       |
|----|----------------------------|----------------------------------|-----------|-------------------------------------------------------------------------------------------------|-----------------------|
| 1. | West Bengal,<br>India; 397 | Drinking water<br>(water, urine) | T3575A    | TA/AA genotype is associated with high risks of skin lesions, ocular, and respiratory diseases. | Banerjee et al., 2011 |
| 2. | Bangladesh; 940            | Drinking water<br>(water)        | rs3024496 | Polymorphism significantly modified arsenic induced skin lesion status.                         | Seow et al., 2015     |

**IL8 (*Interleukin 8*)**

|   |                            |                                  |        |                                                                                                 |                       |
|---|----------------------------|----------------------------------|--------|-------------------------------------------------------------------------------------------------|-----------------------|
| 1 | West Bengal,<br>India; 397 | Drinking water<br>(water, urine) | T3575A | TA/AA genotype is associated with high risks of skin lesions, ocular, and respiratory diseases. | Banerjee et al., 2011 |
|---|----------------------------|----------------------------------|--------|-------------------------------------------------------------------------------------------------|-----------------------|

**TNFα (*Tumor Necrosis Factor alpha*)**

|   |                            |                                  |       |                                                                                                 |                       |
|---|----------------------------|----------------------------------|-------|-------------------------------------------------------------------------------------------------|-----------------------|
| 1 | West Bengal,<br>India; 397 | Drinking water<br>(water, urine) | G308A | GA/AA genotype is associated with high risks of skin lesions, ocular, and respiratory diseases. | Banerjee et al., 2011 |
| 2 | Taiwan; 894                | Drinking water<br>(urine)        | G308A | Variant of G308A is associated with urothelial carcinoma.                                       | Wu et al., 2013       |

*NALP2(also known as NLRP2, NLR family pyrin domain containing 2)*

---

|   |                         |                               |            |                                                                                                                       |                             |
|---|-------------------------|-------------------------------|------------|-----------------------------------------------------------------------------------------------------------------------|-----------------------------|
| 1 | West Bengal, India; 432 | Drinking water (water, urine) | Ala1052Glu | Ala1052Glu polymorphism was associated with low risks of skin lesions, respiratory diseases, chromosomal aberrations. | Bhattacharjee et al., 2013b |
|---|-------------------------|-------------------------------|------------|-----------------------------------------------------------------------------------------------------------------------|-----------------------------|

---

**DNA methyl transferase genes**

*DNMT1, DNMT3A and DNMT3B (DNA methyl transferase 1, 3A and 3B)*

---

|    |             |                        |                                                                                            |                                                                                                                                                                                                                                                                                |                   |
|----|-------------|------------------------|--------------------------------------------------------------------------------------------|--------------------------------------------------------------------------------------------------------------------------------------------------------------------------------------------------------------------------------------------------------------------------------|-------------------|
| 1. | Taiwan, 586 | Drinking water (urine) | DNMT1 (rs8101626 and rs2228611)<br>DNMT3A (rs34048824 and rs1550117)<br>DNMT3B (rs1569686) | high urinary total arsenic level combined with the DNMT1 rs8101626 A/A + A/G genotype and the DNMT3A rs34048824 T/T + T/C genotype may increase the clear cell renal cell carcinoma risk in a dose-response manner, even for subjects who live in a low arsenic exposure area. | Yang et al., 2016 |
|----|-------------|------------------------|--------------------------------------------------------------------------------------------|--------------------------------------------------------------------------------------------------------------------------------------------------------------------------------------------------------------------------------------------------------------------------------|-------------------|

---

**Obesity related gene**

*Adiponectin*

---

|    |             |                                        |                                                        |                                                                                                                                                                                 |                    |
|----|-------------|----------------------------------------|--------------------------------------------------------|---------------------------------------------------------------------------------------------------------------------------------------------------------------------------------|--------------------|
| 1. | Taiwan, 778 | Drinking water, sea food, rice (urine) | ADIPOQ rs182052<br>rs2241766<br>rs1501299<br>rs1063539 | significant combined effects of obesity and the ADIPOQ rs182052 G/A+A/A genotype on the arsenic-related risk of Renal Cell Carcinoma in a population with low arsenic exposure. | Hsueh et al., 2018 |
|----|-------------|----------------------------------------|--------------------------------------------------------|---------------------------------------------------------------------------------------------------------------------------------------------------------------------------------|--------------------|

---

**Gene related to cell signalling**

*INPP5A (Inositol Polyphosphate 5-Phosphatase A)*

---

|    |                 |                        |           |                                                                                                                                                                                                                                      |                   |
|----|-----------------|------------------------|-----------|--------------------------------------------------------------------------------------------------------------------------------------------------------------------------------------------------------------------------------------|-------------------|
| 1. | Bangladesh; 940 | Drinking water (water) | rs1133400 | Minor allele carriers of the skin cancer gene INPP5A was associated arsenic-induced skin lesions in both main and replicative populations. Genetic variation in INPP5A appears to have a role in susceptibility to arsenic toxicity. | Seow et al., 2015 |
|----|-----------------|------------------------|-----------|--------------------------------------------------------------------------------------------------------------------------------------------------------------------------------------------------------------------------------------|-------------------|

---

[ As – Arsenic, iAs – Inorganic Arsenic, MMA – Monomethylated Arsenic species, DMA –Dimethylated Arsenic species]

## References

- Agusa, T., Iwata, H., Fujihara, J., Kunito, T., Takeshita, H., Minh, T. B., Trang P., T., K., Viet, P., H., Tanabe, S. 2010. Genetic polymorphisms in glutathione S-transferase (GST) superfamily and arsenic metabolism in residents of the Red River Delta, Vietnam. *Toxicology and Applied Pharmacology*, 242(3), 352–362.
- Andrew, A., S., Mason, R., A., Kelsey, K., T., Schned, A., R., Carmen, J., Nelson, H., H., & Karagas, M., R., 2010. DNA repair genotype interacts with arsenic exposure to increase bladder cancer risk. *Toxicol Lett.* 187(1), 10–14.
- Balakrishnan, P., Vaidya, D., Franceschini, N., Voruganti, V., S., Gribble, M., O., Lee, E., (2017). Association of Cardiometabolic Genes with Arsenic Metabolism Biomarkers. *Environmental Health Perspectives* 125(1), 15–22.
- Banerjee, N., Nandy, S., Kearns, J., K., Bandyopadhyay, A., K., Das, J., K., Majumder, P., Basu, S., Banerjee, S., Sau, T., States, C., Giri, A., K., 2011. Polymorphisms in the TNF- $\alpha$  and IL10 gene promoters and risk of arsenic-induced skin lesions and other nondermatological health effects. *Toxicological Sciences*, 121(1), 132–139.
- Banerjee, N., Paul, S., Sau, T. J., Das, J. K., Bandyopadhyay, A., Banerjee, S., & Giri, A. K. (2013). Epigenetic Modifications of DAPK and p16 Genes Contribute to Arsenic-Induced Skin Lesions and Nondermatological Health Effects. 135(2), 300–308.
- Beebe-Dimmer, J., L., Iyer, P., T., Nriagu, J., O., Keele, G., R., Mehta, S., Meliker, J., R., Cooney, K. A., et al., 2012. Genetic variation in Glutathione S-Transferase Omega-1, Arsenic Methyltransferase and Methylene-tetrahydrofolate Reductase, arsenic exposure and bladder cancer: A case-control study. *Environmental Health: A Global Access Science Source*, 11(1), 1.
- Bhattacharjee, P., Das, N., Chatterjee, D., Banerjee, A., Das, J., K., Basu, S., Banerjee, S., Majumder, P., Goswami, P., Giri, A., K., 2013. Association of NALP2 polymorphism with arsenic induced skin lesions and other health effects. *Mutation Research - Genetic Toxicology and Environmental Mutagenesis*, 755(1), 1–5.
- Chung, C., J., Pu, Y., S., Su, C., T., Chen, H., W., Huang, Y., K., Shiue, H., S., & Hsueh, Y., M., 2010. Polymorphisms in one-carbon metabolism pathway genes, urinary arsenic profile, and urothelial carcinoma. *Cancer Causes and Control*, 21(10), 1605–1613.
- Chung, C., J., Pu, Y., S., Su, C., T., Huang, C., Y., & Hsueh, Y., M., 2011. Gene polymorphisms of glutathione S-transferase omega 1 and 2, urinary arsenic methylation profile and urothelial carcinoma. *Science of the Total Environment*, 409(3), 465–470. Colin, P., Koenig, P., Ouzzane, A., Berthon, N., Villers, A., Biserte, J., and Roupert, M., 2009. Environmental factors involved in carcinogenesis of urothelial cell carcinomas of the upper urinary tract. *BJU international*. 104, 1436-1440.

- Das, N., Giri, A., Chakraborty, S., Bhattacharjee, P., 2016. Association of single nucleotide polymorphism with arsenic-induced skin lesions and genetic damage in exposed population of West Bengal, India. *Mutat Res.* 809, 50-56.
- Drobná, Z., Del Razo, L. M., García-Vargas, G. G., Sánchez-Peña, L. C., Barrera-Hernández, A., Stýblo, M., & Loomis, D., (2012). Environmental exposure to arsenic, AS3MT polymorphism and prevalence of diabetes in Mexico. *Journal of exposure science & environmental epidemiology*, 23(2), 151–155. doi:10.1038/jes.2012.103
- Edwards, M., Hall, J., Gong, G., & O'Bryant, S. E. (2014). Arsenic exposure, AS3MT polymorphism, and neuropsychological functioning among rural dwelling adults and elders: A cross-sectional study. *Environmental Health: A Global Access Science Source*, 13(1), 1–7.
- Engström, K.S., Vahter, M., Fletcher, T., Leonardi, G., Goessler, W., Gurzau, E., Koppova, K., Rudnai, P., Kumar, R. and Broberg, K., 2015. Genetic variation in arsenic (+ 3 oxidation state) methyltransferase (AS3MT), arsenic metabolism and risk of basal cell carcinoma in a European population. *Environmental and molecular mutagenesis*, 56(1), pp.60-69.
- Fu, S., Wu, J., Li, Y., Liu, Y., Gao, Y., Yao, F. et al., 2014. Urinary arsenic metabolism in a Western Chinese population exposed to high-dose inorganic arsenic in drinking water: Influence of ethnicity and genetic polymorphisms. *Toxicology and Applied Pharmacology*, 274(1), 117–123.
- Fujihara, J., Soejima, M., Yasuda, T., Koda, Y., Kunito, T., Iwata, H., Tanabe, S. and Takeshita, H., 2011. Polymorphic trial in oxidative damage of arsenic exposed Vietnamese. *Toxicology and applied pharmacology*, 256(2), pp.174-178.
- Fujihara, J., Yasuda, T., Iwata, H., Tanabe, S., & Takeshita, H., 2016. Association of XRCC1 polymorphisms with arsenic methylation. *Archives of Toxicology*, 90(4), 1009–1012.
- Gamboa-Loira, B., Cebrián, M. E., Salinas-Rodríguez, A., & López-Carrillo, L. (2017). Genetic susceptibility to breast cancer risk associated with inorganic arsenic exposure. *Environmental Toxicology and Pharmacology*, 56(July), 106–113.
- Gao, S., Mostofa, M. G., Quamruzzaman, Q., Rahman, M., Rahman, M., Su, L., ... Christiani, D. C. (2019). Gene-environment interaction and maternal arsenic methylation efficiency during pregnancy. *Environment International*, 125(January), 43–50.
- Gong, G., O'Bryant, S., E., 2012. Low-level arsenic exposure, AS3MT gene polymorphism and cardiovascular diseases in rural Texas counties. *Environ Res.* 113, 52-7.
- Hsieh, Y., C., Lien, L., M., Chung, W., T., Hsieh, F., Hsieh., P., F., Wu, M., M., Tseng, H., P., Chiou, H., Y., Chen, C., J., 2011. Significantly increased risk of carotid atherosclerosis with arsenic exposure and polymorphisms in arsenic metabolism genes. *Environ Res.* 111(6), 804-10.

- Hsu, L.I., Chen, W.P., Yang, T.Y., Chen, Y.H., Lo, W.C., Wang, Y.H., Liao, Y.T., Hsueh, Y.M., Chiou, H.Y., Wu, M.M. and Chen, C.J., 2011. Genetic polymorphisms in glutathione S-transferase (GST) superfamily and risk of arsenic-induced urothelial carcinoma in residents of southwestern Taiwan. *Journal of biomedical science*, 18(1), p.51.
- Hsu, L. I., Wu, M. M., Wang, Y. H., Lee, C. Y., Yang, T. Y., Hsiao, B. Y., & Chen, C. J., 2015. Association of environmental arsenic exposure, genetic polymorphisms of susceptible genes, and skin cancers in Taiwan. *BioMed Research International*, 2015.
- Hsueh, Y. M., Lin, Y. C., Chen, W. J., Huang, C. Y., Shiue, H. S., Pu, Y. S., ... Su, C. T., 2017. The polymorphism XRCC1 Arg194Trp and 8-hydroxydeoxyguanosine increased susceptibility to arsenic-related renal cell carcinoma. *Toxicology and Applied Pharmacology*, 332, 1–7.
- Hsueh, Y. M., Chen, W. J., Lin, Y. C., Huang, C. Y., Shiue, H. S., Yang, S. M., ... Su, C. T., 2018. Adiponectin gene polymorphisms and obesity increase the susceptibility to arsenic-related renal cell carcinoma. *Toxicology and Applied Pharmacology*, 350(250), 11–20.
- Huang, C. Y., Lin, Y. C., Shiue, H. S., Chen, W. J., Su, C. T., Pu, Y. S., Hsueh, Y. M., et al., 2018. Comparison of arsenic methylation capacity and polymorphisms of arsenic methylation genes between bladder cancer and upper tract urothelial carcinoma. *Toxicology Letters*, 295, 64–73.
- Huang, C. Y., Su, C. T., Chu, J. S., Huang, S. P., Pu, Y. S., Yang, H. Y., Hsueh, Y. M., 2011. The polymorphisms of P53 codon 72 and MDM2 SNP309 and renal cell carcinoma risk in a low arsenic exposure area. *Toxicology and Applied Pharmacology*, 257(3), 349–355.
- Huang, C.Y., Chung, C.J., Pu, Y., S., Lin, Y., C., Wu, C., C., Shiue, H., S., Huang, Y., K., 2013. Polymorphism of inflammatory genes and arsenic methylation capacity are associated with urothelial carcinoma. *Toxicology and Applied Pharmacology*, 272(1), 30–36.
- Huang, C.Y., Huang, Y.L., Hsueh, Y.M., Lin, Y.C., Chiang, C.I., Chen, W.J., ... Shiue, H.S., 2014. XRCC1 Arg194Trp and Arg399Gln polymorphisms and arsenic methylation capacity are associated with urothelial carcinoma. *Toxicology and Applied Pharmacology*, 279(3), 373–379.
- Hwang, Y. H., Chen, Y. H., Su, Y. N., Hsu, C. C., Chen, Y. H., & Yuan, T. H. (2010). Genetic polymorphism of As3MT and delayed urinary DMA excretion after organic arsenic intake from oyster ingestion. *Journal of Environmental Monitoring*, 12(6), 1247–1254.
- Kaya-Akyüzü, D., Kayaalti, Z., & Söylemezoğlu, T. (2016). Influence of MRP1 G1666A and GSTP1 Ile105Val genetic variants on the urinary and blood arsenic levels of Turkish smelter workers. *Environmental Toxicology and Pharmacology*, 43, 68–73.
- Lesseur, C., Gilbert-Diamond, D., Andrew, A.S., Ekstrom, R.M., Li, Z., Kelsey, K.T., Marsit, C.J. and Karagas, M.R., 2012. A case-control study of polymorphisms in xenobiotic and arsenic metabolism genes and arsenic-related bladder cancer in New Hampshire. *Toxicology letters*, 210(1), pp.100-106.

- Lin, G. F., Du, H., Chen, J. G., Lu, H. C., Guo, W. C., Golka, K., & Shen, J. H., 2010. Association of XPD/ERCC2 G 23591 A and A 35931 C polymorphisms with skin lesion prevalence in a multiethnic, arseniasis- hyperendemic village exposed to indoor combustion of high arsenic coal. *Archives of Toxicology*, 84(1), 17–24.
- Luo, L., Li, Y., Gao, Y., Zhao, L., Feng, H., Wei, W., Sun, D., et al., (2018). Association between arsenic metabolism gene polymorphisms and arsenic-induced skin lesions in individuals exposed to high-dose inorganic arsenic in northwest China. *Scientific Reports*, 8(1), 1–12.
- Niedzwiecki, M. M., Liu, X., Zhu, H., Hall, M. N., Slavkovich, V., Ilievski, V., ... Gamble, M. V., 2018. Serum homocysteine, arsenic methylation, and arsenic-induced skin lesion incidence in Bangladesh: A one-carbon metabolism candidate gene study. *Environment International*, 113(December 2017), 133–142.
- Pierce, B. L., Tong, L., Argos, M., Gao, J., Jasmine, F., Roy, S., Ahsan, H., et al., 2013. Arsenic metabolism efficiency has a causal role in arsenic toxicity: Mendelian randomization and gene-environment interaction. *International Journal of Epidemiology*, 42(6), 1862–1872.
- Pierce, B. L., Kibriya, M. G., Tong, L., Jasmine, F., Argos, M., Roy, S., Ahsan, H. et al., (2012). Genome-wide association study identifies chromosome 10q24.32 variants associated with arsenic metabolism and toxicity phenotypes in Bangladesh. *PLoS Genetics*, 8(2).
- Porter, K. E., Basu, A., Hubbard, A. E., Bates, M. N., Kalman, D., Rey, O., Skibola, C. F. et al., (2011). Association of Genetic Variation in Cystathionine- $\beta$ -Synthase and Arsenic Metabolism. *Environ Res* . 110(6), 580–587.
- Rodrigues, E. G., Kile, M., Hoffman, E., Quamruzzaman, Q., Rahman, M., Mahiuddin, G., Christiani, D. C., et al., 2012. GSTO and AS3MT genetic polymorphisms and differences in urinary arsenic concentrations among residents in Bangladesh. *Biomarkers*, 17(3), 240–247.
- Steinmaus, C., Yuan, Y., Kalman, D., Rey, O., A., Skibola, C., F., Dauphine, D., Basu, A., Porter, K., E., Hubbard, A., Bates, M., N., Smith, M., T., and Smith. A., H., 2010. Individual Differences in Arsenic Metabolism and Lung Cancer in a Case-Control Study in Cordoba, Argentina. *ToxicolApplPharmacol*. 1, 247(2).
- Wu, M. M., Chiou, H. Y., Chen, C. L., Hsu, L. I., Lien, L. M., Wang, C. H., Chen, C. J., et al., 2011. Association of heme oxygenase-1 GT-repeat polymorphism with blood pressure phenotypes and its relevance to future cardiovascular mortality risk: An observation based on arsenic-exposed individuals. *Atherosclerosis*, 219(2), 704–708.
- Wu, M. M., Chiou, H. Y., Lee, T. C., Chen, C. L., Hsu, L. I., Wang, Y. H., ... Chen, C. J., 2010. GT-repeat polymorphism in the heme oxygenase-1 gene promoter and the risk of carotid atherosclerosis related to arsenic exposure. *Journal of Biomedical Science*, 17(1), 1–11.

Yang, J., Yan, L., Zhang, M., Wang, Y., Wang, C., & Xiang, Q. (2015). Associations between the polymorphisms of GSTT1, GSTM1 and methylation of arsenic in the residents exposed to low-level arsenic in drinking water in China. *Journal of Human Genetics*, 60(7), 387–394.

Yang, S. M., Huang, C. Y., Shiue, H. S., Pu, Y. S., Hsieh, Y. H., Chen, W. J., ... Hsueh, Y. M., 2016. Combined effects of DNA methyltransferase 1 and 3A polymorphisms and urinary total arsenic levels on the risk for clear cell renal cell carcinoma. *Toxicology and Applied Pharmacology*, 305, 103–110.

Yu, Y., Guo, Y., Zhang, J., Xie, J., Zhu, Y., Yan, J., Wang, B. and Li, Z., 2017. A perspective of chronic low exposure of arsenic on non-working women: Risk of hypertension. *Science of The Total Environment*, 580, pp.69-73.
